# Supplementary material for: The Association between TNF-α, IL-6, and Vitamin D Levels and COVID-19 Severity and Mortality: A Systematic Review and Meta-Analysis
Source: MDPI journal article supplement (doi:10.3390/pathogens11020195), 2022-02-01
Supplement: s1 [file s1]

**Supplementary Table S6.** Studies investigating the association between IL-6 and CoVID-19 mortality with hazard ratio values.

| Study, year                       | Study design                        | Crude HR (95% CI)           | p value | Adjusted HR (95% CI)     | p value | Adjusted for                                                                                                                             |
|-----------------------------------|-------------------------------------|-----------------------------|---------|--------------------------|---------|------------------------------------------------------------------------------------------------------------------------------------------|
| <b>Abers MS 2021 [32]</b>         | Cohort                              | 1.87<br>(1.24–2.84)         | 0.0033  | 1.77<br>(1.24–2.52)      | 0.0015  | Time to sampling, age, chronic kidney disease, and use of immunomodulatory medications prior to sample collection                        |
| <b>Avila-Nava A 2021 [41]</b>     | Cohort                              | –                           | –       | 1.01<br>(1.003–1.020)    | 0.011   | Age, gender, diabetes, hypertension                                                                                                      |
| <b>Bai Y 2021 [42]</b>            | Retrospective cohort                | 1.082<br>(1.055–1.110)      | <0.001  | 1.085<br>(1.048–1.124)   | <0.001  | Age, sex, hypertension, diabetes, CHD, AF, CVD, COPD, CKD, malignancy, NLR, D-dimer, PTA, LDH, $\alpha$ -HBDH, ALB, DBIL, BUN, CysC, CRP |
| <b>Chen H 2021 [45]</b>           | Cohort                              | –                           | –       | 1.001<br>(1.0003–1.002)  | 0.005   | NEU, NLR, CRP, D-dimer, PT, MYO                                                                                                          |
| <b>Donoso-Navarro E 2021 [47]</b> | Retrospective cohort                | 1.00094<br>(1.00054–1.0013) | <0.0001 | 1.0011<br>(1.001–1.0016) | <0.0001 | Age, LDH, limfosit                                                                                                                       |
| <b>Li T 2021 [54]</b>             | Retrospective cohort                | 1.02<br>(1.01–1.03)         | <0.001  | 1.02<br>(1.01–1.04)      | 0.004   | Age, CRP                                                                                                                                 |
| <b>Ruscica M 2021 [59]</b>        | Retrospective cohort                | 1.0033<br>(1.0014–1.0052)   | 0.001   | –                        | –       | –                                                                                                                                        |
| <b>Trecarichi EM 2020 [61]</b>    | Single-center, retrospective cohort | 1.005<br>(1.002–1.008)      | <0.001  | 1.005<br>(1.001–1.009)   | 0.007   | Blood sodium level, lymphocytes, CVD other than hypertension                                                                             |
| <b>Wang JH 2021 [36]</b>          | Single-center, retrospective cohort | 1.002<br>(1.002–1.002)      | <0.001  | –                        | –       | –                                                                                                                                        |
| <b>Wu C 2020 [36]</b>             | Retrospective cohort                | 1.03<br>(1.01–1.05)         | 0.01    | –                        | –       | –                                                                                                                                        |
| <b>Yang B 2021 [39]</b>           | Cohort                              | 1.001<br>(1.000–1.001)      | <0.001  | –                        | –       | –                                                                                                                                        |
