# Supplementary material for: The Association between TNF-α, IL-6, and Vitamin D Levels and COVID-19 Severity and Mortality: A Systematic Review and Meta-Analysis
Source: MDPI journal article supplement (doi:10.3390/pathogens11020195), 2022-02-01
Supplement: s1 [file s1]

**Supplementary Table S7.** Studies investigating the association between vitamin D levels and severe CoVID-19 with mean vitamin D values.

| Study, year               | Study design         | NOS score | Severe<br>Mean±SD (ng/ml) | n   | Non-severe<br>Mean±SD (ng/ml) | n   | p value |
|---------------------------|----------------------|-----------|---------------------------|-----|-------------------------------|-----|---------|
| Campi I 2021 [68]         | Cohort               | 6         | 18.2±11.4                 | 103 | 30.3±8.4                      | 52  | <0,0001 |
| Jahangirimehr A 2021 [72] | Cross-sectional      | 5         | 24.57±11.42               | 37  | 19.5379±10.753                | 56  | 0,077   |
| Jevalikar G 2021 [73]     | Cross-sectional      | 5         | 31.7±26.8                 | 20  | 26.3±24.9                     | 390 | 0,165   |
| Karahan S 2020 [74]       | Retrospective cohort | 5         | 10.1±6.2                  | 102 | 26.3±8.4                      | 47  | <0,001  |
| Pizzini A 2020 [76]       | Cohort               | 5         | 20±9.6                    | 53  | 23.1714±9.8615                | 56  | 0,116   |
| Vasheghani M 2021 [77]    | Cross-sectional      | 5         | 25.8915±19.8631           | 223 | 30.734±23.1905                | 285 | 0,001   |
