# Supplementary material for: The Association between TNF-α, IL-6, and Vitamin D Levels and COVID-19 Severity and Mortality: A Systematic Review and Meta-Analysis
Source: MDPI journal article supplement (doi:10.3390/pathogens11020195), 2022-02-01
Supplement: s1 [file s1]

**Supplementary Table S5.** Studies investigating the association between IL-6 and CoVID-19 mortality with odds ratio values.

| Study, year                             | Study design                        | Crude OR (95% CI)   | p value | Adjusted OR (95% CI) | p value | Adjusted for                                                                                          |
|-----------------------------------------|-------------------------------------|---------------------|---------|----------------------|---------|-------------------------------------------------------------------------------------------------------|
| <b>Bhadade R 2020 [43]</b>              | Cohort                              | –                   | –       | 1.004 (1.001–1.008)  | 0.02441 | Age, hypertension, DM, variable endotracheal intubation, PFR, SpO <sub>2</sub> , ferritin and D-dimer |
| <b>Chen C 2020 [44]</b>                 | Single-center, retrospective cohort | 1.007 (0.971–1.044) | 0.705   | 1.015 (0.948–1.086)  | 0.667   | CHD, lymphocytes, monocytes, NLR, AST, PCT, SSA, D-dimer, FDP                                         |
| <b>Gou L 2021 [49]</b>                  | Retrospective cohort                | 1.02 (1.01–1.04)    | 0,004   | 1.01 (1.00–1.03)     | 0.032   | Age, gender, dyspnea, random blood glucose, eGFR, D-dimer, CRP, PT, sodium                            |
| <b>Gu Y 2021 [14]</b>                   | Single-center, retrospective cohort | 1.009 (1.003–1.015) | 0.003   | 1.013 (1.001–1.025)  | 0.028   | PaO <sub>2</sub>                                                                                      |
| <b>Laguna-Goya R 2020 [51]</b>          | Single-center, cohort               | 1.008 (1.005–1.012) | <0.0001 | –                    | –       | –                                                                                                     |
| <b>Lavillegrand R 2021 [52]</b>         | Multicenter, cohort                 | –                   | –       | 2.20 (1.58–3.05)     | <0.001  | SOFA at ICU admission and time from symptom onset to dosage                                           |
| <b>Liu QQ 2020 [56]</b>                 | Single-center, retrospective cohort | 1.031 (1.022–1.040) | <0.001  | 1.013 (1,003–1,024)  | 0.015   | Age, gender, comorbidities, disease severity, lymphocyte count, IL-2R, IL-8, IL-10, TNF- $\alpha$     |
| <b>Maeda T 2021 [57]</b>                | Single-center, retrospective cohort | –                   | –       | 1.002 (1.000–1.003)  | 0.018   | Age, D-dimer                                                                                          |
| <b>Martinez-Ubristond o M 2020 [58]</b> | Single-center, cross-sectional      | –                   | –       | 9.81 (1.56–61.69)    | 0.02    | Age, sex, Charlson Comorbidity Index Score, LDH, CRP, NLI, RDW, ferritin, exctraction day             |
| <b>Sai F 2021 [60]</b>                  | Single-center, retrospective cohort | 1.01 (1.00–1.02)    | 0.061   | –                    | –       | –                                                                                                     |
| <b>Zhou F 2020 [65]</b>                 | Multicenter, retrospective cohort   | 1.12 (1.03–1.23)    | 0.0080  | –                    | –       | –                                                                                                     |
