# Supplementary material for: The Association between TNF-α, IL-6, and Vitamin D Levels and COVID-19 Severity and Mortality: A Systematic Review and Meta-Analysis
Source: MDPI journal article supplement (doi:10.3390/pathogens11020195), 2022-02-01
Supplement: s1 [file s1]

**Supplementary Table S1.** Study characteristics.

| ID                             | Study, year            | Country | Study design                        | Population                                                                               | Severity criteria                                                                                                                                                                                                                    | n    |
|--------------------------------|------------------------|---------|-------------------------------------|------------------------------------------------------------------------------------------|--------------------------------------------------------------------------------------------------------------------------------------------------------------------------------------------------------------------------------------|------|
| <b>TNF-<math>\alpha</math></b> |                        |         |                                     |                                                                                          |                                                                                                                                                                                                                                      |      |
| 1                              | Abers MS 2021 [32]     | Italy   | Cohort                              | COVID-19 patients                                                                        | –                                                                                                                                                                                                                                    | 175  |
| 2                              | Hou H 2020 [33]        | China   | Cohort                              | COVID-19 patients                                                                        | Guidelines of diagnosis and treatment for COVID-19 made by the Chinese National Health Commission                                                                                                                                    | 389  |
| 3                              | Liu G 2021 [34]        | China   | Cohort                              | COVID-19 patients                                                                        | Not stated                                                                                                                                                                                                                           | 296  |
| 4                              | Tian J 2020 [35]       | China   | Multicenter, retrospective cohort   | COVID-19 patients with any type of malignant solid tumours and haematological malignancy | WHO guidelines, complemented by the Seventh Revised Trial Version of the COVID-19 Diagnosis and Treatment Guidance (2020) of China                                                                                                   | 232  |
| 5                              | Wang JH 2021 [36]      | China   | Single-center, retrospective cohort | COVID-19 patients                                                                        | –                                                                                                                                                                                                                                    | 1135 |
| 6                              | Wang M 2021 [37]       | China   | Cohort                              | COVID-19 patients                                                                        | Diagnosis and Treatment of Novel Coronavirus Patients (the Fifth Pilot Ed.)                                                                                                                                                          | 211  |
| 7                              | Xie M 2021 [38]        | China   | Retrospective cohort                | COVID-19 patients                                                                        | 2019 clinical practice guideline from American Thoracic Society (ATS) and Infectious Diseases Society of America (IDSA) for diagnosis and treatment of adults with community-acquired pneumonia and WHO criteria for severe COVID-19 | 280  |
| 8                              | Yang B 2021 [39]       | China   | Cohort                              | Patients with severe COVID-19                                                            | –                                                                                                                                                                                                                                    | 320  |
| 9                              | Zhu Z 2020 [40]        | China   | Single-center, retrospective cohort | COVID-19 patients                                                                        | Guidelines for diagnosis and treatment for COVID-19 (Trail Version 6)                                                                                                                                                                | 127  |
| <b>IL-6</b>                    |                        |         |                                     |                                                                                          |                                                                                                                                                                                                                                      |      |
| 1                              | Abers MS 2021 [32]     | Italy   | Cohort                              | COVID-19 patients                                                                        | –                                                                                                                                                                                                                                    | 175  |
| 10                             | Avila-Nava A 2021 [41] | Mexico  | Cohort                              | COVID-19 patients                                                                        | –                                                                                                                                                                                                                                    | 38   |
| 11                             | Bai Y 2021 [42]        | China   | Retrospective cohort                | COVID-19 patients                                                                        | Guideline of diagnosis and management for COVID-19 (sixth edition) by the National Health Commission of China                                                                                                                        | 3342 |
| 12                             | Bhadade R 2020 [43]    | India   | Cohort                              | Critically ill COVID-19 patients                                                         | –                                                                                                                                                                                                                                    | 373  |

|    |                                   |        |                                           |                                                          |                                                                                                                                                                                         |     |
|----|-----------------------------------|--------|-------------------------------------------|----------------------------------------------------------|-----------------------------------------------------------------------------------------------------------------------------------------------------------------------------------------|-----|
| 13 | Chen C<br>2020 [44]               | China  | Single-center,<br>retrospective<br>cohort | COVID-19<br>patients with<br>comorbidities               | –                                                                                                                                                                                       | 132 |
| 14 | Chen H<br>2021 [45]               | China  | Cohort                                    | COVID-19<br>patients                                     | –                                                                                                                                                                                       | 855 |
| 15 | Chen X<br>2020 [46]               | China  | Cohort                                    | COVID-19<br>patients                                     | New Coronavirus Pneumonia Diagnosis<br>and Treatment Plan (trial version 6) by the<br>National Health Committee of the People's<br>Republic of China                                    | 102 |
| 16 | Donoso-<br>Navarro E<br>2021 [47] | Spain  | Retrospective<br>cohort                   | COVID-19<br>patients                                     | –                                                                                                                                                                                       | 546 |
| 17 | Gao F<br>2021 [48]                | China  | Cohort                                    | COVID-19<br>patients                                     | Diagnosis and Treatment Protocol for<br>Novel Coronavirus Pneumonia (Trial<br>Version 7) by the National Health<br>Commission & State Administration of<br>Traditional Chinese Medicine | 167 |
| 18 | Gou L<br>2021 [49]                | China  | Retrospective<br>cohort                   | Critically ill<br>COVID-19<br>patients                   | –                                                                                                                                                                                       | 114 |
| 19 | Gu Y 2021<br>[14]                 | China  | Single-center,<br>retrospective<br>cohort | COVID-19<br>patients<br>admitted to the<br>ICU           | –                                                                                                                                                                                       | 57  |
| 2  | Hou H<br>2020 [33]                | China  | Cohort                                    | COVID-19<br>patients                                     | Guidelines of diagnosis and treatment for<br>COVID-19 by the Chinese National Health<br>Commission                                                                                      | 389 |
| 20 | Huang H<br>2021 [50]              | China  | Retrospective<br>cohort                   | COVID-19<br>patients                                     | Guidelines for the Diagnosis and Treatment<br>for Novel Coronavirus Pneumonia (version<br>7) by the National Health Commission of<br>the People's Republic of China                     | 64  |
| 21 | Laguna-<br>Goya R<br>2020 [51]    | Spain  | Single-center,<br>cohort                  | COVID-19<br>patients                                     | –                                                                                                                                                                                       | 501 |
| 22 | Lavillegra<br>nd R 2021<br>[52]   | France | Multicenter,<br>cohort                    | COVID-19<br>patients<br>admitted to the<br>ICU           | –                                                                                                                                                                                       | 101 |
| 23 | Li T 2020<br>[53]                 | China  | Retrospective,<br>cohort                  | COVID-19<br>patients not<br>younger than 65<br>years old | American Thoracic Society guidelines for<br>community-acquired pneumonia                                                                                                                | 312 |
| 24 | Li T 2021<br>[54]                 | China  | Retrospective<br>cohort                   | COVID-19<br>patients                                     | –                                                                                                                                                                                       | 75  |
| 3  | Liu G<br>2021 [34]                | China  | Cohort                                    | COVID-19<br>patients                                     | Not stated                                                                                                                                                                              | 296 |
| 25 | Liu Q<br>2020 [55]                | China  | Cross-sectional                           | COVID-19<br>patients                                     | Novel coronavirus pneumonia diagnosis<br>and treatment plan (trial version 7)                                                                                                           | 84  |
| 26 | Liu QQ<br>2020 [56]               | China  | Single-center,<br>retrospective<br>cohort | COVID-19<br>patients                                     | –                                                                                                                                                                                       | 308 |

|    |                                     |               |                                     |                                                                                          |                                                                                                                                                                                                                  |      |
|----|-------------------------------------|---------------|-------------------------------------|------------------------------------------------------------------------------------------|------------------------------------------------------------------------------------------------------------------------------------------------------------------------------------------------------------------|------|
| 27 | Maeda T<br>2021 [57]                | United States | Single-center, retrospective cohort | COVID-19 patients                                                                        | –                                                                                                                                                                                                                | 224  |
| 28 | Martinez-Ubristond<br>o M 2020 [58] | Spain         | Single-center, cross-sectional      |                                                                                          | –                                                                                                                                                                                                                | 165  |
| 29 | Ruscica M<br>2021 [59]              | Italy         | Retrospective cohort                | COVID-19 patients                                                                        | –                                                                                                                                                                                                                | 97   |
| 30 | Sai F 2021 [60]                     | China         | Single-center, retrospective cohort | COVID-19 patients admitted to B-ICU                                                      | –                                                                                                                                                                                                                | 47   |
| 4  | Tian J<br>2020 [35]                 | China         | Multicenter, retrospective cohort   | COVID-19 patients with any type of malignant solid tumours and haematological malignancy | WHO guidelines, complemented by the Seventh Revised Trial Version of the COVID-19 Diagnosis and Treatment Guidance (2020) of China                                                                               | 232  |
| 31 | Trecarichi EM 2020 [61]             | Italy         | Single-center, retrospective cohort | COVID-19 patients                                                                        | –                                                                                                                                                                                                                | 48   |
| 5  | Wang JH<br>2021 [36]                | China         | Single-center, retrospective cohort | COVID-19 patients                                                                        | –                                                                                                                                                                                                                | 1135 |
| 6  | Wang M<br>2021 [37]                 | China         | Cohort                              | COVID-19 patients                                                                        | Diagnosis and Treatment of Novel Coronavirus Patients (the Fifth Pilot Ed.)                                                                                                                                      | 211  |
| 32 | Wang Y<br>2020 [62]                 | China         | Case-control                        | Children diagnosed with COVID-19                                                         | Diagnosis, treatment, and prevention of 2019 novel coronavirus infection in children: experts' consensus statement                                                                                               | 43   |
| 33 | Wu C<br>2020 [63]                   | China         | Retrospective cohort                | COVID-19 patients who developed ARDS                                                     | –                                                                                                                                                                                                                | 84   |
| 7  | Xie M<br>2021 [38]                  | China         | Retrospective cohort                | COVID-19 patients                                                                        | 2019 clinical practice guideline from American Thoracic Society (ATS) and Infectious Diseases Society of America (IDSA) for diagnosis and treatment of adults with community-acquired pneumonia and WHO criteria | 280  |
| 8  | Yang B<br>2021 [39]                 | China         | Cohort                              | Patients with severe COVID-19                                                            | –                                                                                                                                                                                                                | 320  |
| 34 | Yi P 2020 [18]                      | China         | Single-center, retrospective cohort | COVID-19 patients                                                                        | Clinical management of 2019 nCoV guidelines by the National Health Commission of the People Republic of China                                                                                                    | 100  |

|                  |                                  |                            |                                           |                                      |                                                                                                                                                                                                                                                                   |     |
|------------------|----------------------------------|----------------------------|-------------------------------------------|--------------------------------------|-------------------------------------------------------------------------------------------------------------------------------------------------------------------------------------------------------------------------------------------------------------------|-----|
| 35               | Zhao C<br>2021 [64]              | China                      | Single-center,<br>retrospective<br>cohort | COVID-19<br>patients                 | Report of the WHO-China Joint Mission on<br>COVID-19                                                                                                                                                                                                              | 172 |
| 36               | Zhou F<br>2020 [65]              | China                      | Multicenter,<br>retrospective<br>cohort   | COVID-19<br>patients                 | –                                                                                                                                                                                                                                                                 | 191 |
| 9                | Zhu Z<br>2020 [40]               | China                      | Single-center,<br>retrospective<br>cohort | COVID-19<br>patients                 | Guidelines for diagnosis and treatment for<br>COVID-19 (Trail Version 6)                                                                                                                                                                                          | 127 |
| 37               | Zhu Z<br>2021 [66]               | China                      | Single-center,<br>retrospective<br>cohort | COVID-19<br>patients                 | National Diagnosis and Treatment Protocol<br>for Novel Coronavirus Infection-Induced<br>Pneumonia (6th Trial Version)                                                                                                                                             | 142 |
| <b>Vitamin D</b> |                                  |                            |                                           |                                      |                                                                                                                                                                                                                                                                   |     |
| 38               | AlSafar H<br>2021 [67]           | United<br>Arab<br>Emirates | Multicenter,<br>cohort                    | COVID-19<br>patients                 | –                                                                                                                                                                                                                                                                 | 464 |
| 39               | Campi I<br>2021 [68]             | Italy                      | Cohort                                    | Patients with<br>severe COVID-<br>19 | Severe criteria:<br>Spontaneous oxygen saturation $\leq 93\%$<br>and/or PaO <sub>2</sub> /FiO <sub>2</sub> ratio < 300 mmHg)<br>requiring invasive or non-invasive<br>ventilation, with or without the presence of<br>fever (>37.5°C) and other organ dysfunction | 155 |
| 40               | Cereda E<br>2021 [69]            | Italy                      | Cohort                                    | COVID-19<br>patients                 | –                                                                                                                                                                                                                                                                 | 129 |
| 41               | De Smet<br>D 2020<br>[70]        | Belgium                    | Retrospective<br>cohort                   | COVID-19<br>patients                 | –                                                                                                                                                                                                                                                                 | 186 |
| 42               | Derakhsh<br>anian H<br>2021 [71] | Iran                       | Retrospective<br>cohort                   | COVID-19<br>patients                 | –                                                                                                                                                                                                                                                                 | 290 |
| 43               | Jahangiri<br>mehr A<br>2021 [72] | Iran                       | Cross-sectional                           | COVID-19<br>patients                 | Not stated                                                                                                                                                                                                                                                        | 93  |
| 44               | Jevalikar<br>G 2021<br>[73]      | India                      | Cross-sectional                           | COVID-19<br>patients                 | WHO ordinal scale for clinical<br>improvement (OSCI)                                                                                                                                                                                                              | 410 |
| 45               | Karahan S<br>2020 [74]           | Turkey                     | Retrospective<br>cohort                   | COVID-19<br>patients                 | Diagnosis and Treatment Protocol for<br>Novel Coronavirus Pneumonia (Trial<br>Version 7)                                                                                                                                                                          | 149 |
| 46               | Lohia P<br>2021 [75]             | United<br>States           | Retrospective<br>cohort                   | COVID-19<br>patients                 | –                                                                                                                                                                                                                                                                 | 270 |
| 47               | Pizzini A<br>2020 [76]           | Austria                    | Cohort                                    | COVID-19<br>patients                 | Severe criteria: patients requiring oxygen<br>supply, respiratory support, or intensive<br>care treatment                                                                                                                                                         | 109 |
| 48               | Vashegha<br>ni M 2021<br>[77]    | Iran                       | Cross-sectional                           | COVID-19<br>patients                 | WHO criteria                                                                                                                                                                                                                                                      | 508 |
