# Supplementary material for: The Association between TNF-α, IL-6, and Vitamin D Levels and COVID-19 Severity and Mortality: A Systematic Review and Meta-Analysis
Source: MDPI journal article supplement (doi:10.3390/pathogens11020195), 2022-02-01
Supplement: s1 [file s1]

**Supplementary Table S8.** Studies investigating the association between vitamin D deficiency<sup>1</sup> and COVID-19 mortality.

| Study, year                       | Study design         | Crude OR<br>(95% CI) | p value | Adjusted OR<br>(95% CI) | p value | Adjusted for                                                              |
|-----------------------------------|----------------------|----------------------|---------|-------------------------|---------|---------------------------------------------------------------------------|
| <b>AlSafar H 2021 [67]</b>        | Multicenter cohort   | 0.94<br>(0.41–2.17)  | 0.89    | 1.71<br>(0.66–4.43)     | 0.27    | Age, sex, and comorbidities                                               |
| <b>Cereda E 2021 [69]</b>         | Cohort               | –                    | –       | 0.28<br>(0.09–0.99)     | 0.038   | Age, sex, C-reactive protein, ischemic heart disease and severe pneumonia |
| <b>De Smet D 2020 [70]</b>        | Retrospective cohort | –                    | –       | 3.87<br>(1.30–11.55)    | 0.0154  | Age, sex, comorbidities, CT stage, CT severity score                      |
| <b>Derakhshania n H 2021 [71]</b> | Retrospective cohort | 2.30<br>(1.25–4.26)  | <0.05   | 2.0<br>(1.03–3.83)      | <0.05   | Age, sex                                                                  |
| <b>Lohia P 2021 [75]</b>          | Retrospective cohort | 0.69<br>(0.39–1.24)  | 0.21    | 1.04<br>(0.55–1.97)     | 0.9     | Age, sex, body mass index (BMI), and comorbidities                        |

<sup>1</sup> Vitamin D deficiency is defined as 25(OH)D<20 ng/mL [78].
