# Supplementary material for: The Association between TNF-α, IL-6, and Vitamin D Levels and COVID-19 Severity and Mortality: A Systematic Review and Meta-Analysis
Source: MDPI journal article supplement (doi:10.3390/pathogens11020195), 2022-02-01
Supplement: s1 [file s1]

**Supplementary Table S3.** Studies investigating the association between TNF- $\alpha$  and CoVID-19 mortality with hazard ratio values.

| Study,<br>year                | Study design                              | Crude HR<br>(95% CI)   | p value | Adjusted HR<br>(95% CI) | p value | Adjusted for                                                                                                      |
|-------------------------------|-------------------------------------------|------------------------|---------|-------------------------|---------|-------------------------------------------------------------------------------------------------------------------|
| <b>Abers MS<br/>2021 [32]</b> | Cohort                                    | 1.26<br>(0.78–2.06)    | 0.3568  | 1.18<br>(0.81–1.71)     | 0.3819  | Time to sampling, age, chronic kidney disease, and use of immunomodulatory medications prior to sample collection |
| <b>Wang JH<br/>2021 [36]</b>  | Single-center,<br>retrospective<br>cohort | 1.085<br>(1.062–1.109) | <0.01   | –                       | –       | –                                                                                                                 |
| <b>Yang B<br/>2021 [39]</b>   | Cohort                                    | 1.044<br>(1.032–1.056) | <0.001  | –                       | –       | –                                                                                                                 |
