# Supplementary material for: The Association between TNF-α, IL-6, and Vitamin D Levels and COVID-19 Severity and Mortality: A Systematic Review and Meta-Analysis
Source: MDPI journal article supplement (doi:10.3390/pathogens11020195), 2022-02-01
Supplement: s1 [file s1]

**Supplementary Table S4.** Studies investigating the association between IL-6 and severe CoVID-19 with odds ratio values.

| Study, year              | Study design                      | Crude OR (95% CI)   | p value | Adjusted OR (95% CI)   | p value | Adjusted for                                                                                                                                                                                                                                                                                                                                                                                                                                                               |
|--------------------------|-----------------------------------|---------------------|---------|------------------------|---------|----------------------------------------------------------------------------------------------------------------------------------------------------------------------------------------------------------------------------------------------------------------------------------------------------------------------------------------------------------------------------------------------------------------------------------------------------------------------------|
| <b>Bai Y 2021 [42]</b>   | Retrospective cohort              | 1.150 (1.001–1.321) | 0.049   | –                      | –       | –                                                                                                                                                                                                                                                                                                                                                                                                                                                                          |
| <b>Chen X 2020 [46]</b>  | Cohort                            | –                   | –       | 1.099 (1.055–1.144)    | 0.000   | CD4+ cells, CD8+ cells, T regs, B cells, NK cells, IL-10                                                                                                                                                                                                                                                                                                                                                                                                                   |
| <b>Gao F 2021 [48]</b>   | Cohort                            | 1.06 (1.03–1.09)    | <0.001  | 1.04 (1.02–1.09)       | 0.002   | Age, sex, overweight/obesity, type 2 diabetes, and hypertension                                                                                                                                                                                                                                                                                                                                                                                                            |
| <b>Hou H 2020 [33]</b>   | Cohort                            | –                   | –       | 1.0000 (0.9916–1.0085) | 0.9936  | IL-1b, IL-2R, IL-6, IL-8, IL-10, TNF- $\alpha$ , lymphocyte, neutrophil, PCT, IL-2R/lymphocytes, CRP, ferritin                                                                                                                                                                                                                                                                                                                                                             |
| <b>Huang H 2021 [50]</b> | Retrospective cohort              | –                   | –       | 0.979 (0.917–1.045)    | 0.52    | Age, ferritin, ALB, HGB, lymphocytes, glu, LDH, CRP, ESR                                                                                                                                                                                                                                                                                                                                                                                                                   |
| <b>Li T 2020 [53]</b>    | Retrospective cohort              | –                   | –       | 4.32 (2.07–7.13)       | 0.0016  | Age, SOFA score, APACHEII score, platelet, d-dimer, creatinine, consolidation                                                                                                                                                                                                                                                                                                                                                                                              |
| <b>Liu G 2021 [34]</b>   | Cohort                            | –                   | –       | 0.998 (0.996–1)        | 0.092   | IFN- $\gamma$ , IL-2, IL-4, IL-10, TNF- $\alpha$                                                                                                                                                                                                                                                                                                                                                                                                                           |
| <b>Liu Q 2020 [55]</b>   | Cross-sectional                   | –                   | –       | 1.281 (1.026–1.600)    | 0.029   | Age, BMI, blood pressure, smoking history, coexisting disorder, white blood cell count, neutrophil, lymphocyte, NLR, PLR, CRP, SAA                                                                                                                                                                                                                                                                                                                                         |
| <b>Tian J 2020 [35]</b>  | Multicenter, retrospective cohort | 1.03 (1.01–1.06)    | 0.014   | 1.03 (1.00–1.05)       | 0.019   | Age, sex, comorbidities, tumour stage, cancer type, ECOG performance status, antitumour treatments, IL-2R, PCT, CRP, lymphocyte, lymphocyte count, CD3-CD19+ B-cell count, CD4+ T cells, CD3-CD16+CD56+ natural killer cells, leukocyte count, neutrophils, monocytes, LDH, albumin, albumin-globulin ratio, NT-proBNP, myoglobin, hs-cTnI, platelet count, activated partial thromboplastin time, prothrombin time, D-dimer                                               |
| <b>Wang M 2021 [37]</b>  | Cohort                            | –                   | –       | 1.227 (1.040–1.447)    | 0.015   | Age, sex, duration from illness onset to admission, duration of hospitalization, temperature before admission, temperature at day 15 after admission, hypertension, diabetes, cardiovascular and cerebrovascular diseases, respiratory system diseases, white blood cell count, lymphocyte, alanine aminotransferase, aspartate aminotransferase, creatinine, IFN-g, IL-2, IL-4, IL-6, IL-10, CD3+ T cells, B cells, NK cells, CD4+ T cells, CD8+ T cells, CD4+/CD8+ ratio |
| <b>Wang Y 2020 [62]</b>  | Case-control                      | 1.05 (0.98–1.12)    | 0.14    | –                      | –       | –                                                                                                                                                                                                                                                                                                                                                                                                                                                                          |
| <b>Xie M 2021 [38]</b>   | Retrospective cohort              | 1.011 (1.005–1.018) | 0.001   | –                      | –       | –                                                                                                                                                                                                                                                                                                                                                                                                                                                                          |

| Study, year      | Study design                        | Crude OR (95% CI)   | p value | Adjusted OR (95% CI) | p value | Adjusted for                                                                                                                                      |
|------------------|-------------------------------------|---------------------|---------|----------------------|---------|---------------------------------------------------------------------------------------------------------------------------------------------------|
| Yi P 2020 [18]   | Single-center, retrospective cohort | –                   | –       | 1.005 (0.995–1.015)  | 0.307   | Age, BMI, T cells, B cells, artificial liver support                                                                                              |
| Zhao C 2021 [64] | Single-center, retrospective cohort | 1.115 (1.074–1.157) | <0.001  | –                    | –       | –                                                                                                                                                 |
| Zhu Z 2020 [40]  | Single-center, retrospective cohort | 1.086 (1.041–1.133) | <0.001  | 1.090 (1.040–1.147)  | <0.001  | Hypertension, CRP                                                                                                                                 |
| Zhu Z 2021 [66]  | Single-center, retrospective cohort | 1.096 (1.050–1.144) | <0.001  | 1.097 (1.034–1.165)  | 0.002   | Age, BMI, hypertension, neutrophil%, lymphocyte%, lymphocyte count, platelet count, fibrinogen, CRP, IL-6, IL-10, HDL-C, ApoA1, ALB, AST, and LDH |
