# Supplementary material for: The Association between TNF-α, IL-6, and Vitamin D Levels and COVID-19 Severity and Mortality: A Systematic Review and Meta-Analysis
Source: Pathogens. 2022 Feb 1;11(2):195. doi: 10.3390/pathogens11020195 (PMC8879207; doi:10.3390/pathogens11020195)
Supplement: Supplementary file 1 [file pathogens-11-00195-s001.zip]

Archive with 9 entries (9 files):
- Supplementary Table S1. Study characteristics..pdf
- Supplementary Table S2. Studies investigating the association between TNF-a and severe COVID-19 with odds ratio values..pdf
- Supplementary Table S3. Studies investigating the association between TNF-a and COVID-19 mortality with hazard ratio values..pdf
- Supplementary Table S4. Studies investigating the association between IL-6 and severe COVID-19 with odds ratio values..pdf
- Supplementary Table S5. Studies investigating the association between IL-6 and CoVID-19 mortality with odds ratio values..pdf
- Supplementary Table S6. Studies investigating the association between IL-6 and CoVID-19 mortality with hazard ratio values..pdf
- Supplementary Table S7. Studies investigating the association between vitamin D levels and severe CoVID-19 with mean vitamin D values..pdf
- Supplementary Table S8. Studies investigating the association between vitamin D deficiency and COVID-19 mortality..pdf
- Supplementary Text 1. Detailed search strategies and MeSH..pdf
